# Supplementary material
Source: PubMed Central journal article supplement (PMC7612227)
Supplement: EMS87073-supplement-Supplementary_information.pdf [file EMS87073-supplement-Supplementary_information.pdf]

## Plasma phospho-tau181 in familial Alzheimer's disease

| EYO<br>(years) | P-tau181<br>(p-value) | NfL<br>(p-value) |
|----------------|-----------------------|------------------|
| -20            | 0.27                  | 0.18             |
| -19            | 0.20                  | 0.12             |
| -18            | 0.13                  | 0.065            |
| -17            | 0.085                 | 0.033            |
| -16            | 0.050                 | 0.015            |
| -15            | 0.027                 | 0.0055           |
| -14            | 0.014                 | 0.0017           |
| -13            | 0.0061                | 0.00046          |
| -12            | 0.0025                | 0.00010          |
| -11            | 0.00096               | <0.0001          |
| -10            | 0.00033               | <0.0001          |
| -9             | 0.00011               | <0.0001          |

**Supplementary Table 1S: Evidence for divergence between mutation carriers and non-carriers**

### **in plasma biomarkers at sequential EYO timepoints**

P-values from tests of whether the estimated difference between carriers and non-carriers for geometric mean i) plasma p-tau181 and ii) plasma NfL is statistically significantly different from zero, after adjusting for age and gender, for integer values of EYO between –20 to –9 years. P-values expressed to two significant figures unless  $p < 0.0001$ .

## Plasma phospho-tau181 in familial Alzheimer's disease

| Median/IQR of person-level p-tau181 medians |                              |                              |
|---------------------------------------------|------------------------------|------------------------------|
|                                             | Presymptomatic               | Symptomatic                  |
| <i>APP</i>                                  | 14.5<br>(8.4, 17.6)<br>N=6   | 17.0<br>(16.4, 19.0)<br>N=5  |
| <i>PSEN1</i>                                | 14.2<br>(9.9, 19.9)<br>N=18  | 25.1<br>(19.1, 39.8)<br>N=14 |
| <i>PSEN1</i><br>Pre-codon<br>200            | 15.3<br>(13.5, 18.6)<br>N=10 | 23.5<br>(18.3, 29.5)<br>N=8  |
| <i>PSEN1</i><br>Post-codon<br>200           | 11.2<br>(9.7, 22.8)<br>N=8   | 32.2<br>(21.9, 42.0)<br>N=6  |

### Supplementary Table 2S: Plasma p-tau181 levels according to genetic subgroup

Median and IQRs of observed plasma p-tau181 values grouped by genetic mutation and mutation position. All data were used and medians of person-level medians calculated to allow for repeated measures at the individual level.

## Plasma phospho-tau181 in familial Alzheimer's disease

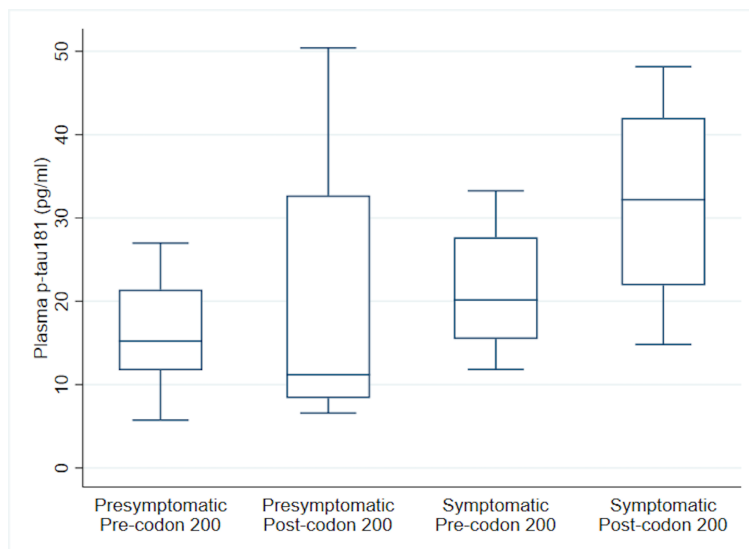

**Supplementary Figure 15:** Observed baseline p-tau181 values for *PSEN1* individuals by disease status and by mutation position pre- vs. post-codon 200. A box shows the median, and 25th and 75th percentiles; the whiskers extend to the largest value less than or equal to the upper quartile + 1.5 times the interquartile range, and the smallest value greater than or equal to the lower quartile - 1.5 times the interquartile range; values outside this range are shown individually.
